# Supplementary material
Source: PubMed Central journal article supplement (PMC2670031)
Supplement: tjp0587-0155-SD1.pdf [file tjp0587-0155-SD1.pdf]

**Supplementary Table 1. Orientation parameters for the BR probes on the C and E helices of TnC.**

|                               | <b>C helix; TnC-BR<sub>55-62</sub></b> |                                             |                               | <b>E helix; TnC-BR<sub>95-102</sub></b> |                                             |                               |
|-------------------------------|----------------------------------------|---------------------------------------------|-------------------------------|-----------------------------------------|---------------------------------------------|-------------------------------|
|                               | 5 mM MgATP<br>(n=5)                    | 5 mM MgATP +<br>25 μM Blebbistatin<br>(n=4) | 0 mM MgATP,<br>Rigor<br>(n=5) | 5 mM MgATP<br>(n=5)                     | 5 mM MgATP +<br>25 μM Blebbistatin<br>(n=4) | 0 mM MgATP,<br>Rigor<br>(n=4) |
| <b>&lt;P<sub>2d</sub>&gt;</b> |                                        |                                             |                               |                                         |                                             |                               |
| pCa 9                         | 0.867 ± 0.009                          | 0.864 ± 0.010                               | 0.847 ± 0.014                 | 0.913 ± 0.009                           | 0.905 ± 0.012                               | 0.879 ± 0.017                 |
| pCa 4.2–3.8                   | 0.858 ± 0.011                          | 0.867 ± 0.011                               | 0.851 ± 0.014                 | 0.892 ± 0.011                           | 0.901 ± 0.010                               | 0.879 ± 0.015                 |
| <b>&lt;P<sub>2</sub>&gt;</b>  |                                        |                                             |                               |                                         |                                             |                               |
| pCa 9                         | 0.086 ± 0.003                          | 0.086 ± 0.003                               | 0.043 ± 0.010                 | 0.207 ± 0.003                           | 0.222 ± 0.002                               | 0.038 ± 0.006                 |
| pCa 4.2–3.8                   | -0.011 ± 0.003                         | -0.004 ± 0.004                              | -0.019 ± 0.004                | 0.135 ± 0.006                           | 0.167 ± 0.004                               | -0.010 ± 0.005                |
| <b>&lt;P<sub>4</sub>&gt;</b>  |                                        |                                             |                               |                                         |                                             |                               |
| pCa 9                         | -0.042 ± 0.006                         | -0.036 ± 0.002                              | -0.015 ± 0.010                | -0.041 ± 0.006                          | -0.029 ± 0.007                              | 0.003 ± 0.011                 |
| pCa 4.2–3.8                   | -0.036 ± 0.006                         | -0.033 ± 0.003                              | -0.026 ± 0.009                | -0.061 ± 0.008                          | -0.058 ± 0.007                              | 0.000 ± 0.010                 |
